# Supplementary material for: The Impact of Symbolic and Non-Symbolic Quantity on Spatial Learning
Source: PLoS One. 2015 Mar 6;10(3):e0119395. doi: 10.1371/journal.pone.0119395 (PMC4351879; doi:10.1371/journal.pone.0119395)
Supplement: S1 Dataset — This spreadsheet gives the raw means for each subject at each location (A is the upper left corner, with lettering moving from left to right and top to bottom), and for each string length in each spatial type. (XLS) [file pone.0119395.s001.xls]

## Sheet: data for plos manu
exp	sub	gender	A_Item	B_Item	C_Item	D_Item	E_Item	F_Item	G_Item	H_Item	I_Item	J_Item	K_Item	L_Item	M_Item	N_Item	O_Item	P_Item	IND_A_Item	IND_B_Item	IND_C_Item	IND_D_Item	IND_E_Item	IND_F_Item	IND_G_Item	IND_H_Item	IND_I_Item	IND_J_Item	IND_K_Item	IND_L_Item	IND_M_Item	IND_N_Item	IND_O_Item	IND_P_Item	LR_A_Item	LR_B_Item	LR_C_Item	LR_D_Item	LR_E_Item	LR_F_Item	LR_G_Item	LR_H_Item	LR_I_Item	LR_J_Item	LR_K_Item	LR_L_Item	LR_M_Item	LR_N_Item	LR_O_Item
1	KS	0	0.875	0.885714	0.862069	1	0.833333	0.897436	0.84	0.962963	1	0.75	0.862069	0.933333	0.782609	0.466667	0.727273	0.842105	1	1	0.9	1	0.666667	0.85	0.714286	1	1	0.777778	1	1	0.833333	0.4	0.25	0.7	0.833333	0.666667	0.7	1	0.842105	0.928571	0.75	0.666667	1	0.785714	0.555556	0.5	0.7	0.571429	0.333333
1	SG	0	1	0.972222	1	1	0.958333	0.948718	1	0.96	1	0.857143	0.931034	0.954545	1	0.8	0.909091	0.842105	1	1	1	1	0.666667	0.95	1	0.8	1	0.555556	1	1	1	0.4	0.5	0.8	1	0.916667	1	1	1	0.928571	1	1	1	1	0.777778	0.833333	1	1	0.888889
1	TT	0	1	0.944444	0.896552	0.966667	0.958333	1	0.96	1	0.965517	0.892857	0.896552	0.977778	0.956522	0.8	0.969697	0.947368	1	1	0.9	1	0.666667	1	1	1	1	0.888889	0.875	1	0.916667	0.8	1	0.9	1	0.916667	0.8	0	1	1	0.875	1	1	1	0.777778	0.833333	1	1	0.888889
1	CX	0	0.9375	0.972222	0.896552	0.966667	0.863636	0.897436	0.76	0.962963	0.965517	0.785714	0.931034	0.955556	0.869565	0.533333	0.848485	0.842105	1	0.941176	0.7	1	0.333333	0.8	0.714286	1	1	0.666667	0.875	0.9375	0.75	0.4	0.25	0.7	1	1	1	0	1	1	0.75	0.666667	1	0.857143	0.888889	0.833333	1	0.714286	0.777778
1	ML	0	0.78125	0.75	0.517241	0.9	0.666667	0.666667	0.44	0.703704	0.9	0.321429	0.551724	0.727273	0.608696	0.4	0.484848	0.176471	0.9	0.823529	0.2	0.894737	0	0.6	0.571429	0	1	0.111111	0.75	0.9375	0.583333	0.4	0	0.2	0.833333	0.583333	0.6	0	0.842105	0.785714	0.25	0	1	0.5	0.111111	0	0.7	0.571429	0
1	FS	0	0.90625	0.914286	0.862069	0.964286	0.833333	0.666667	0.56	0.777778	0.966667	0.678571	0.62069	0.755556	0.782609	0.666667	0.606061	0.631579	1	0.875	0.6	0.941176	0.666667	0.45	0.285714	0.4	1	0.444444	1	0.5625	0.583333	0.6	0.5	0.3	1	1	1	1	0.947368	1	0.5	0.666667	1	0.928571	0.444444	0.5	1	1	0.111111
1	MN	0	0.875	0.805556	0.62069	1	0.818182	0.717949	0.6	0.777778	0.862069	0.392857	0.586207	0.777778	0.73913	0.266667	0.69697	0.210526	1	0.705882	0.4	1	0	0.65	0.428571	0.2	1	0.111111	1	0.9375	0.75	0	0.25	0	0.888889	0.833333	0.5	1	0.941176	0.785714	0.5	0.333333	0.9375	0.714286	0.333333	0.166667	0.8	0.571429	0.333333
1	ER	0	0.96875	0.75	0.655172	0.833333	0.863636	0.666667	0.68	0.777778	0.931034	0.714286	0.551724	0.688889	0.695652	0.666667	0.666667	0.263158	1	0.705882	0.3	0.789474	0	0.5	0.571429	0.2	0.9	0.111111	0.5	0.5625	0.416667	0	0	0.1	1	0.666667	0.7	0	1	0.857143	0.625	0.333333	1	1	0.333333	0.5	1	1	0.444444
1	SL	0	1	0.972222	0.862069	0.933333	0.875	0.948718	0.92	1	0.966667	0.892857	0.827586	0.909091	0.913043	0.8	0.939394	0.764706	1	1	0.7	0.894737	0	0.9	1	1	1	0.666667	0.625	0.75	0.833333	0.4	0.5	0.6	1	0.916667	0.9	1	1	1	1	1	1	1	1	1	1	1	1
1	LD0	0	0.96875	0.944444	0.896552	1	0.916667	0.871795	1	1	1	0.964286	1	1	0.782609	0.8	0.909091	0.947368	1	0.882353	0.8	1	1	0.75	1	1	1	0.888889	1	1	0.666667	0.6	0.5	0.9	0.944444	1	1	1	0.947368	1	1	1	1	1	1	1	0.9	0.857143	1
1	MP	0	0.71875	0.888889	0.827586	0.866667	0.791667	0.820513	0.68	0.64	0.766667	0.5	0.62069	0.568182	0.869565	0.333333	0.606061	0.473684	0.7	0.882353	0.8	0.789474	0	0.75	0.714286	0.4	0.7	0.555556	0.125	0.4375	0.833333	0	0	0.4	0.888889	0.916667	0.8	1	1	0.928571	0.5	0.666667	0.823529	0.571429	0.777778	0.333333	1	0.571429	0.444444
1	DL	0	0.96875	1	0.931034	1	0.954545	1	1	1	1	0.964286	1	1	0.913043	1	1	1	1	1	0.8	1	0.666667	1	1	1	1	0.888889	1	1	0.916667	1	1	1	1	1	1	1	1	1	1	1	1	1	1	1	1	1	1
1	WX	0	0.9375	1	0.827586	0.933333	0.875	0.974359	0.92	0.888889	0.966667	0.785714	0.862069	0.886364	0.913043	0.333333	0.848485	0.647059	1	1	0.7	0.947368	0.333333	0.95	0.857143	0.8	1	0.666667	0.75	0.9375	0.916667	0.2	0.25	0.4	1	1	0.8	1	1	1	0.875	0.666667	1	0.785714	0.888889	0.5	1	0.571429	0.777778
1	CS	0	0.75	0.805556	0.655172	0.966667	0.782609	0.897436	0.68	0.703704	0.933333	0.535714	0.862069	0.711111	0.380952	0.333333	0.666667	0.684211	1	0.823529	0.4	0.947368	1	0.9	1	0.8	1	0.333333	1	0.9375	0.5	0.4	0.5	0.6	0.666667	0.833333	0.9	1	0.722222	0.928571	0.625	0.666667	1	0.785714	0.888889	0.333333	0.25	0.428571	0.777778
1	SY	0	1	1	0.931034	0.964286	0.958333	0.923077	1	1	0.933333	1	0.827586	0.977778	0.956522	1	0.969697	1	1	1	0.8	0.947368	0.666667	0.85	1	1	1	1	0.875	0.9375	0.916667	1	0.75	1	1	1	1	1	1	1	1	1	1	1	0.555556	1	1	1	1
1	JH	0	1	0.944444	0.931034	1	0.833333	0.897436	0.84	0.962963	0.9	0.75	1	0.977778	1	0.666667	0.878788	0.894737	1	1	0.9	1	0.333333	0.95	1	0.8	1	0.555556	1	1	1	0.4	0.75	0.8	1	0.916667	0.9	1	0.894737	0.857143	0.875	1	0.882353	0.785714	1	0.833333	1	0.714286	0.888889
1	SZ	1	0.96875	0.971429	0.896552	1	0.875	0.948718	0.88	0.962963	0.966667	1	0.965517	0.955556	0.956522	0.866667	0.878788	0.947368	1	1	0.8	1	0.333333	0.95	0.857143	0.8	1	1	1	0.9375	0.916667	0.6	0.25	0.9	1	1	1	1	1	1	0.75	1	1	1	1	1	1	1	1
1	CT	1	0.96875	1	0.931034	1	0.916667	1	1	0.96	0.966667	0.964286	0.896552	0.977273	1	0.866667	0.969697	0.736842	1	1	0.8	1	0.333333	1	1	1	1	0.888889	1	1	1	0.6	0.75	0.6	1	1	1	1	1	1	1	0.666667	1	1	0.888889	1	1	1	1
1	YM	1	0.966667	0.888889	0.827586	1	0.826087	0.871795	0.96	0.851852	1	0.62963	0.724138	0.955556	0.782609	0.4	0.787879	0.578947	1	0.882353	0.5	1	0	0.9	0.857143	0.8	1	0.333333	1	1	0.583333	0	0	0.3	1	0.833333	1	1	1	0.857143	1	0.333333	1	0.692308	0.222222	0.666667	1	0.428571	0.777778
1	PC	1	0.9375	0.972222	0.896552	1	0.818182	0.871795	0.92	0.814815	0.931034	0.75	0.862069	0.933333	0.913043	0.733333	0.848485	0.578947	1	0.941176	0.7	1	0.333333	0.75	0.714286	0	1	0.333333	0.875	0.8125	0.916667	0.2	0	0.2	1	1	1	1	0.941176	1	1	1	0.9375	1	0.888889	1	1	1	0.888889
1	KC	1	0.96875	0.914286	0.896552	0.964286	0.916667	0.923077	0.92	0.925926	0.933333	0.928571	0.965517	0.933333	1	1	0.909091	0.947368	1	1	1	1	0.666667	0.95	1	0.8	1	0.888889	1	1	1	1	1	1	1	0.916667	0.9	0	1	1	1	0.666667	1	1	0.888889	0.666667	1	1	0.777778
1	KW	1	1	0.914286	0.931034	1	0.916667	0.820513	0.76	0.851852	0.966667	0.892857	0.827586	0.844444	0.869565	0.8	0.878788	0.789474	1	1	0.8	1	0.333333	0.8	0.714286	0.8	1	1	0.75	0.875	0.75	0.8	0.5	0.8	1	0.75	1	1	1	0.785714	0.625	0.666667	1	0.785714	0.777778	0.833333	1	0.714286	0.888889
1	MV	1	0.65625	0.444444	0.344828	0.866667	0.863636	0.384615	0.36	0.62963	0.62069	0.464286	0.517241	0.533333	0.26087	0.466667	0.272727	0.210526	0.7	0.294118	0.2	0.842105	0.333333	0.25	0	0.6	0.9	0	0.25	0.4375	0.25	0	0	0.2	0.555556	0.333333	0.4	1	0.941176	0.357143	0.5	0.666667	0.375	0.857143	0.444444	1	0.2	1	0.666667
1	KL	1	0.9375	0.833333	0.793103	0.9	1	0.769231	0.8	0.814815	0.9	0.821429	0.862069	0.909091	0.826087	0.666667	0.787879	0.823529	1	0.882353	0.7	0.947368	1	0.75	0.714286	0.6	1	0.555556	1	0.9375	0.666667	0.4	0.25	0.7	0.944444	0.75	0.8	0	1	0.785714	0.625	0	0.941176	0.928571	0.666667	0.666667	1	0.714286	0.666667
1	EF	1	0.96875	0.944444	0.793103	0.9	0.833333	0.871795	0.92	0.925926	0.966667	1	0.793103	0.818182	0.869565	0.933333	0.878788	0.823529	1	1	0.7	0.842105	0	0.85	1	1	1	1	0.625	0.8125	0.75	0.8	0.75	0.7	1	1	0.9	1	1	0.928571	0.75	0.666667	0.941176	1	0.888889	0.5	1	1	0.888889
1	JL	1	0.8125	0.916667	0.793103	0.833333	0.958333	0.871795	0.88	0.925926	0.9	0.821429	0.62069	0.909091	0.956522	0.8	0.727273	0.529412	0.6	0.941176	0.6	0.789474	0.666667	0.85	0.857143	0.8	0.9	0.666667	0.875	1	0.916667	0.4	0.5	0.5	0.944444	0.916667	0.9	0	1	0.928571	0.875	0.666667	0.941176	0.857143	0.444444	0.666667	1	1	0.444444
1	CR	1	0.9375	0.805556	0.827586	1	0.958333	0.615385	0.68	0.923077	0.9	0.785714	0.931034	0.866667	0.652174	0.733333	0.818182	0.736842	1	0.705882	0.6	1	1	0.4	0.285714	0.8	1	0.444444	0.875	0.8125	0.416667	0.2	0.5	0.5	0.944444	0.833333	0.9	1	1	0.785714	0.875	1	0.823529	1	0.888889	0.666667	1	1	0.777778
1	XX	1	1	1	0.931034	1	0.958333	1	1	0.961538	1	1	1	1	0.956522	1	0.939394	1	1	1	0.8	1	0.666667	1	1	1	1	1	1	1	0.916667	1	0.5	1	1	1	1	1	1	1	1	0.666667	1	1	1	1	1	1	1
1	AS	1	1	0.888889	0.758621	0.933333	0.833333	0.846154	0.96	0.88	0.966667	0.75	0.827586	0.886364	0.826087	0.666667	0.757576	0.736842	1	1	0.6	0.947368	0	0.85	1	1	1	0.555556	0.875	0.9375	0.666667	0.2	0	0.5	1	0.75	0.7	0	0.947368	0.785714	0.875	0.333333	0.941176	0.928571	0.888889	0.5	1	1	0.555556
1	KP	1	1	1	0.896552	1	1	1	1	0.962963	0.965517	0.964286	1	1	1	0.8	0.939394	0.894737	1	1	0.7	1	1	1	1	1	1	1	1	1	1	0.6	0.5	0.8	1	1	1	1	1	1	1	1	1	0.928571	1	1	1	0.857143	1
1	CM	1	0.84375	0.972222	0.862069	1	0.958333	0.846154	0.84	0.961538	0.8	0.678571	0.931034	0.822222	0.826087	0.733333	0.787879	0.578947	1	0.941176	0.7	1	0.666667	0.7	1	1	1	0.333333	0.75	0.6875	0.666667	0.8	0	0.3	0.777778	1	1	1	1	1	0.625	0.666667	0.764706	0.785714	1	0.666667	1	0.571429	0.666667
1	AM	1	0.875	0.861111	0.724138	0.928571	0.782609	0.846154	0.88	0.807692	0.793103	0.703704	0.931034	0.8	0.826087	0.8	0.69697	0.473684	1	0.941176	0.6	1	0	0.75	0.714286	0.8	1	0.111111	1	0.875	0.75	0.4	0.25	0.1	0.777778	0.666667	0.6	0	0.888889	0.928571	0.875	0	0.625	1	0.777778	0.333333	1	1	0.444444
2	GE	0	0.875	0.857143	0.724138	0.892857	0.958333	0.846154	0.88	0.888889	0.833333	0.857143	0.655172	0.755556	0.826087	0.8	0.787879	0.578947	1	0.9375	0.6	0.882353	0.666667	0.85	1	1	1	0.888889	0.5	0.75	0.666667	1	0.75	0.8	0.833333	0.75	0.7	0	1	0.928571	0.625	0.333333	0.823529	0.785714	0.444444	0.833333	1	0.571429	0.444444
2	AF	0	0.875	0.388889	0.137931	0.666667	0.875	0.282051	0.36	0.6	0.666667	0.642857	0.448276	0.477273	0.565217	0.533333	0.393939	0.210526	0.9	0.470588	0	0.789474	0	0.15	0.142857	0.6	0.8	0.111111	0.375	0.5	0.166667	0	0.25	0.2	0.888889	0.5	0.4	0	1	0.571429	0.5	0.333333	0.647059	1	0.333333	0.5	1	1	0.333333
2	ZZ	0	0.96875	0.914286	0.758621	0.928571	0.916667	0.769231	0.76	0.851852	0.933333	0.821429	0.827586	0.866667	0.913043	0.6	0.727273	0.736842	1	0.9375	0.7	0.941176	0.333333	0.7	0.714286	0.8	0.9	0.777778	0.75	0.8125	0.833333	0.6	0.5	0.5	1	1	0.9	0	1	1	0.875	0.333333	1	0.928571	0.888889	0.5	1	0.714286	0.777778
2	SY0	0	1	1	0.933333	0.966667	0.913043	1	1	1	0.966667	0.965517	1	1	1	0.933333	0.970588	0.85	1	1	0.8	1	0.333333	1	1	1	1	1	1	1	1	1	0.75	0.8	1	1	1	0	1	1	1	1	1	0.928571	1	1	1	0.857143	1
2	ES	0	0.90625	0.944444	0.793103	0.966667	0.875	0.820513	0.88	0.888889	0.866667	0.678571	0.965517	0.977273	0.782609	0.733333	0.878788	0.588235	1	1	0.5	1	0.333333	0.8	0.714286	0.6	1	0.333333	1	1	0.583333	0.6	0.25	0.3	0.833333	0.833333	0.9	0	0.947368	0.785714	0.875	0.666667	0.882353	0.857143	0.888889	0.833333	1	0.714286	0.888889
2	JS	0	0.96875	0.971429	1	1	1	0.897436	0.92	0.888889	0.933333	0.928571	1	1	1	0.933333	1	0.894737	1	1	1	1	1	0.9	0.714286	0.4	1	0.777778	1	1	1	0.8	1	0.9	1	1	1	1	1	1	1	1	1	1	1	1	1	1	1
2	CB	0	0.9375	0.666667	0.62069	0.9	0.863636	0.564103	0.72	0.888889	0.965517	0.678571	0.62069	0.755556	0.521739	0.6	0.575758	0.421053	1	0.529412	0	0.842105	0.333333	0.35	0.571429	0.4	1	0.111111	0.375	0.5625	0.166667	0	0.25	0.3	0.944444	0.666667	0.9	1	1	0.714286	0.875	1	0.9375	1	0.888889	0.833333	1	1	0.777778
2	CC	0	0.96875	0.861111	0.689655	0.933333	0.875	0.846154	0.88	0.925926	0.833333	0.928571	0.655172	0.818182	0.869565	0.733333	0.69697	0.411765	1	0.823529	0.6	0.947368	0	0.8	0.714286	0.8	0.9	0.888889	0.75	0.8125	0.75	0.2	0.5	0.2	0.944444	0.916667	0.9	0	1	1	1	0.666667	0.941176	1	0.555556	0.5	1	1	0.555556
2	WQ	0	0.71875	0.666667	0.482759	0.766667	0.791667	0.615385	0.44	0.666667	0.866667	0.464286	0.551724	0.636364	0.347826	0.266667	0.333333	0.411765	1	0.705882	0.2	0.842105	0.333333	0.5	0.714286	0.6	0.9	0.333333	0.625	0.6875	0.25	0	0.25	0.3	0.555556	0.833333	0.9	0	0.842105	0.928571	0.375	0	0.941176	0.571429	0.444444	0.333333	0.4	0.428571	0.222222
2	BB0	0	0.9375	0.861111	0.931034	1	0.833333	0.820513	0.96	0.923077	0.966667	0.785714	0.965517	0.955556	0.913043	0.666667	0.878788	0.578947	1	0.764706	0.8	1	0	0.7	0.857143	0.8	1	0.444444	1	1	0.833333	0.2	0.25	0.3	1	0.916667	1	1	1	0.928571	1	0.666667	1	0.928571	1	0.833333	1	0.857143	0.888889
2	MB	0	1	0.621622	0.733333	1	1	0.625	0.769231	1	0.935484	0.62069	0.862069	0.777778	0.652174	0.866667	0.852941	0.35	1	0.764706	0.2	1	1	0.45	0.285714	1	0.8	0.222222	0.75	0.75	0.333333	0.6	0	0.4	1	0.166667	1	1	1	0.714286	0.875	1	1	0.714286	1	1	1	1	1
2	JC	0	0.59375	0.361111	0.37931	0.5	0.590909	0.333333	0.44	0.555556	0.62069	0.357143	0.448276	0.488889	0.391304	0.133333	0.272727	0.0526316	0.7	0.294118	0	0.368421	0	0.25	0.428571	0	0.8	0	0.5	0.625	0.166667	0	0	0	0.555556	0.5	0.5	0	0.705882	0.571429	0.375	0	0.625	0.714286	0.111111	0	0.7	0.285714	0.111111
2	RS	0	0.9375	1	0.931034	1	0.916667	1	0.96	1	0.966667	0.928571	1	1	0.956522	0.866667	0.969697	0.823529	1	1	0.8	1	0.333333	1	1	1	1	0.777778	1	1	0.916667	0.6	0.75	0.7	0.944444	1	1	1	1	1	0.875	1	0.941176	1	1	1	1	1	1
2	ARL	0	1	1	1	1	1	1	1	1	1	1	1	1	1	1	1	1	1	1	1	1	1	1	1	1	1	1	1	1	1	1	1	1	1	1	1	1	1	1	1	1	1	1	1	1	1	1	1
2	SY	0	0.65625	0.277778	0.37931	0.678571	0.791667	0.333333	0.36	0.423077	0.9	0.285714	0.482759	0.422222	0.26087	0.4	0.30303	0.421053	0.9	0.352941	0.1	0.842105	0.333333	0.2	0.285714	0.4	0.8	0	0.625	0.375	0.166667	0	0	0.4	0.611111	0.25	0.8	0	0.947368	0.5	0.375	0.666667	1	0.428571	0.666667	0.833333	0.4	0.857143	0.555556
2	LME	0	0.96875	0.837838	0.9	0.892857	0.8	0.775	0.923077	0.923077	0.935484	0.793103	0.793103	0.847826	0.73913	0.666667	0.911765	0.8	1	0.823529	0.8	0.842105	0	0.65	1	0.6	1	0.666667	0.75	0.6875	0.5	0	0.5	0.7	1	0.916667	1	1	1	1	0.875	1	1	0.857143	0.666667	0.833333	1	1	1
2	AR	1	0.90625	0.833333	0.689655	0.933333	0.833333	0.794872	0.8	0.84	0.866667	0.607143	0.827586	0.75	0.869565	0.533333	0.69697	0.526316	0.8	0.882353	0.5	0.894737	0.333333	0.8	0.857143	0.6	1	0.333333	0.75	0.8125	0.75	0.2	0.25	0.4	1	0.75	0.7	1	0.894737	0.857143	0.625	0.333333	0.882353	0.642857	0.777778	0.333333	1	0.571429	0.333333
2	AG	1	1	0.916667	0.724138	1	0.916667	0.897436	0.92	0.925926	0.896552	0.714286	0.862069	0.955556	0.826087	0.733333	0.878788	0.684211	1	0.823529	0.2	1	0.333333	0.8	1	0.6	1	0.333333	0.75	0.875	0.75	0.4	0.25	0.4	1	1	1	1	1	1	0.75	1	1	1	0.888889	1	1	1	0.888889
2	CV	1	0.96875	1	0.931034	1	0.954545	0.948718	0.96	0.962963	1	0.821429	0.862069	0.977778	0.913043	0.733333	0.939394	0.894737	1	1	0.8	1	0.666667	0.9	1	1	1	0.666667	1	1	0.833333	0.6	0.75	0.8	0.944444	1	1	1	1	1	0.875	0.666667	1	0.928571	0.777778	0.833333	1	0.857143	0.888889
2	MW	1	0.90625	0.861111	0.758621	1	0.75	0.794872	0.72	0.740741	0.866667	0.357143	0.724138	0.840909	0.782609	0.4	0.69697	0.705882	1	0.941176	0.7	1	0.333333	0.65	0.714286	0	0.8	0	0.75	0.8125	0.666667	0.4	0.5	0.5	1	0.666667	0.6	1	0.894737	0.928571	0.75	0.666667	0.882353	0.642857	0.666667	0.5	1	0.571429	0.444444
2	JGS	1	0.9375	0.971429	0.896552	1	0.833333	0.897436	1	1	0.9	0.892857	1	0.911111	0.782609	0.866667	0.939394	0.684211	1	1	0.7	1	0.333333	0.8	1	1	1	1	1	0.8125	0.75	0.8	0.5	0.5	0.944444	0.916667	1	1	0.894737	1	1	1	0.941176	0.785714	1	1	0.9	0.857143	1
2	GH	1	0.96875	0.888889	0.793103	1	0.863636	0.846154	1	0.962963	0.896552	0.892857	0.896552	0.911111	0.826087	0.933333	0.939394	0.789474	1	0.823529	0.5	1	0	0.8	1	0.8	0.9	0.666667	0.875	0.875	0.666667	0.8	0.75	0.6	1	1	1	1	1	1	1	1	1	1	0.888889	0.833333	1	1	1
2	BM	1	1	1	1	1	1	1	1	0.96	1	1	0.965517	1	1	1	1	1	1	1	1	1	1	1	1	1	1	1	1	1	1	1	1	1	1	1	1	1	1	1	1	0.666667	1	1	1	1	1	1	1
2	JB	1	0.96875	1	0.896552	1	0.875	0.948718	1	0.96	0.966667	0.892857	0.862069	0.909091	0.826087	0.666667	0.939394	0.631579	1	1	0.7	1	0	0.9	1	1	1	0.666667	1	1	0.666667	0.2	0.5	0.7	1	1	1	1	1	1	1	1	1	1	0.777778	1	1	1	1
2	CZ	1	1	0.944444	0.931034	1	1	0.923077	0.92	1	0.965517	0.892857	0.965517	1	0.956522	0.933333	0.939394	0.842105	1	1	0.9	1	1	0.95	1	1	1	0.888889	1	1	0.916667	1	1	0.9	1	1	1	1	1	1	0.875	1	1	0.928571	0.888889	1	1	0.857143	0.888889
2	ES	1	0.84375	0.861111	0.758621	0.833333	1	0.769231	0.96	0.888889	0.965517	0.75	0.689655	0.844444	0.73913	0.733333	0.878788	0.789474	0.6	0.823529	0.5	0.736842	1	0.6	0.857143	0.4	1	0.333333	0.375	0.6875	0.5	0.4	0.5	0.6	1	0.916667	0.9	1	1	0.928571	1	1	0.9375	1	0.888889	0.833333	1	1	1
2	JI	1	1	0.972222	1	1	0.958333	0.974359	1	1	1	0.928571	1	0.977273	1	0.933333	1	0.941176	1	0.941176	1	1	0.666667	0.95	1	1	1	0.777778	1	1	1	0.8	1	0.9	1	1	1	1	1	1	1	1	1	1	1	0.833333	1	1	1
2	EC	1	0.9375	0.944444	0.931034	0.966667	1	0.974359	1	0.962963	0.966667	1	0.827586	0.911111	0.952381	1	0.939394	0.947368	1	1	1	1	1	1	1	1	1	1	0.75	0.875	1	1	1	0.9	0.944444	0.916667	0.9	1	1	0.928571	1	1	0.941176	1	0.888889	0.833333	1	1	0.888889
2	JL0	1	0.96875	1	0.896552	0.933333	0.956522	0.974359	0.96	0.925926	1	1	0.896552	0.955556	0.952381	1	0.878788	0.947368	0.9	1	0.9	0.947368	0.666667	0.95	1	1	1	1	1	1	0.916667	1	0.75	0.9	1	1	0.8	0	1	1	0.875	0.333333	1	1	0.777778	0.666667	1	1	0.666667
2	HC	1	0.9375	0.857143	0.896552	1	0.875	0.820513	0.96	0.962963	0.933333	0.857143	0.724138	0.977778	0.869565	0.666667	0.878788	0.736842	1	1	0.9	1	0.666667	0.95	1	1	1	0.666667	1	1	0.833333	0.2	0.5	0.5	1	0.583333	0.8	1	1	0.571429	0.875	0.666667	1	1	0.666667	0.833333	1	1	0.777778
2	AA	1	0.84375	0.742857	0.586207	0.964286	0.666667	0.589744	0.76	0.851852	0.566667	0.642857	0.655172	0.711111	0.478261	0.666667	0.69697	0.578947	1	0.625	0	1	0.333333	0.3	0.714286	0.6	0.8	0.111111	0.75	0.5	0.0833333	0	0	0.2	0.777778	0.75	0.8	1	0.736842	0.857143	0.75	0.333333	0.529412	1	0.666667	0.333333	1	1	0.555556
2	RE	1	0.966667	1	0.862069	0.965517	0.833333	0.974359	0.92	0.962963	1	0.892857	0.931034	0.955556	0.782609	0.666667	0.787879	0.736842	1	1	0.6	0.944444	0.333333	1	1	0.8	1	0.777778	0.875	1	0.666667	0.2	0	0.6	1	1	1	1	0.947368	0.928571	0.875	1	1	1	1	0.833333	1	1	0.777778
3	AH0	0	0.9375	0.921053	0.774194	0.9	1	0.926829	0.964286	0.925926	0.966667	0.8	0.833333	0.851064	0.956522	0.5625	0.75	0.777778	0.9	1	0.7	0.894737	1	0.9	1	1	1	0.777778	0.75	0.75	0.916667	0.4	0	0.6	1	0.846154	0.818182	0	1	1	1	0.666667	1	1	0.888889	0.714286	1	1	0.7
3	NR0	0	1	0.945946	0.935484	0.964286	0.916667	0.926829	0.928571	0.925926	0.933333	0.933333	0.933333	0.958333	0.956522	0.8125	0.972222	1	1	0.9375	0.9	1	0.333333	0.9	0.857143	0.8	0.9	0.888889	1	0.9375	1	1	1	1	1	0.923077	0.909091	0	1	0.933333	0.888889	0.666667	1	1	0.777778	0.857143	1	1	0.9
3	RT0	0	1	0.894737	0.935484	1	0.916667	0.853659	0.964286	1	0.928571	0.9	1	1	0.913043	0.875	1	0.95	1	0.882353	0.9	1	0.333333	0.85	0.857143	1	1	0.777778	1	1	0.833333	0.6	1	0.9	1	0.846154	0.909091	1	1	0.866667	1	1	1	0.928571	1	1	1	1	1
3	VZ0	0	0.9375	0.894737	0.83871	1	0.833333	0.658537	0.821429	0.851852	0.9	0.633333	0.8	0.957447	0.73913	0.5	0.916667	0.666667	1	0.882353	0.5	1	0	0.55	0.714286	0.6	0.9	0.111111	1	0.9375	0.583333	0	0.25	0.4	0.944444	0.846154	1	1	0.947368	0.8	0.666667	0.333333	1	0.857143	0.888889	0.857143	0.9	0.857143	1
3	AL	0	1	0.710526	0.709677	0.966667	0.875	0.731707	0.75	0.96	0.9	0.7	0.9	0.893617	0.826087	0.6875	0.805556	0.7	1	0.941176	0.6	1	0.333333	0.8	0.857143	1	1	0.444444	1	1	0.666667	0	0.75	0.8	1	0.538462	0.818182	0	0.947368	0.6	0.777778	0.666667	0.941176	0.785714	1	0.714286	1	1	0.7
3	SC	0	1	0.973684	0.935484	1	1	0.97561	1	1	1	1	1	1	0.956522	1	1	1	1	1	0.9	1	1	1	1	1	1	1	1	1	0.916667	1	1	1	1	0.923077	0.909091	1	1	0.933333	1	1	1	1	1	1	1	1	1
3	NA	0	0.9375	0.868421	0.870968	0.966667	0.916667	0.902439	0.928571	0.925926	0.866667	1	0.9	0.914894	1	0.8125	0.833333	0.5	1	0.941176	0.8	1	0.333333	0.95	0.857143	1	1	1	1	0.9375	1	0.4	0.25	0.2	0.888889	1	1	1	1	1	1	0.666667	0.882353	1	0.777778	0.857143	1	1	0.8
3	PL	0	1	0.921053	0.903226	0.966667	1	0.902439	0.964286	1	0.964286	0.9	0.9	0.978723	1	0.8125	0.944444	0.85	1	1	0.9	0.947368	1	0.95	1	1	1	0.888889	0.875	0.933333	1	0.6	0.5	0.7	1	0.923077	1	1	1	0.933333	0.888889	1	1	0.928571	0.777778	1	1	0.857143	1
3	LX	0	0.933333	0.842105	0.774194	1	0.958333	0.829268	0.821429	1	0.793103	0.733333	0.766667	0.875	0.826087	0.5625	0.916667	0.85	1	0.823529	0.5	1	1	0.8	0.571429	1	0.8	0.777778	0.875	0.75	0.666667	0.6	0.75	0.8	0.875	0.769231	0.818182	1	0.947368	0.8	0.777778	1	0.8125	0.642857	0.555556	0.857143	1	0.571429	0.8
3	DH0	0	0.875	1	0.967742	0.966667	1	0.97561	1	1	0.862069	1	0.966667	0.979167	0.956522	1	0.916667	0.85	0.9	1	0.9	0.947368	1	0.95	1	1	1	1	0.875	0.9375	0.916667	1	0.25	0.7	0.833333	1	1	1	1	1	1	1	0.8125	1	1	1	1	1	1
3	JG	0	1	0.973684	0.967742	0.966667	0.954545	0.97561	1	0.962963	1	0.966667	0.966667	0.979167	1	0.9375	0.972222	1	1	1	1	1	1	1	1	1	1	1	1	1	1	1	1	1	1	0.923077	0.909091	0	0.941176	0.933333	1	0.666667	1	0.928571	0.888889	0.857143	1	0.857143	0.9
3	ML0	0	0.96875	0.921053	0.83871	0.966667	0.913043	0.756098	0.821429	0.962963	1	0.866667	0.9	0.958333	0.52381	0.4375	0.805556	0.8	1	0.823529	0.5	0.947368	0.333333	0.5	0.714286	1	1	0.777778	1	1	0.25	0	0	0.7	1	1	1	1	1	1	1	0.666667	1	1	1	0.714286	1	1	0.9
3	OK	0	0.966667	0.894737	0.870968	1	0.916667	0.878049	0.857143	0.962963	1	0.8	0.766667	0.958333	0.913043	0.5625	0.888889	0.9	1	0.882353	0.7	1	0.333333	0.85	0.857143	1	1	0.555556	0.75	0.9375	0.833333	0	0.75	0.8	1	0.846154	0.909091	1	1	0.866667	0.666667	0.666667	1	0.857143	0.666667	0.857143	1	0.714286	0.7
3	DN	0	1	0.972973	0.935484	0.964286	1	0.97561	0.964286	0.962963	1	0.966667	1	0.958333	1	1	1	0.95	1	1	0.9	1	1	1	1	1	1	1	1	1	1	1	1	0.9	1	1	0.909091	0	1	1	0.888889	0.666667	1	0.928571	1	0.714286	1	1	1
3	FZ	0	0.9375	0.947368	0.870968	1	1	0.878049	0.964286	0.888889	0.928571	0.866667	0.9	0.914894	0.913043	0.75	0.916667	0.7	1	1	0.7	1	1	0.85	1	0.8	1	0.777778	0.875	0.866667	0.833333	0.6	0.5	0.5	0.944444	0.923077	1	1	1	0.933333	0.888889	0.666667	0.941176	0.857143	0.888889	0.857143	1	0.714286	1
3	LC	0	1	0.947368	0.870968	1	0.916667	0.926829	1	0.851852	1	0.933333	0.833333	0.833333	0.956522	0.75	0.916667	0.95	1	1	0.6	1	0.666667	1	1	1	1	0.888889	1	0.75	0.916667	0.6	1	0.9	1	0.846154	1	1	0.947368	0.8	1	0.666667	1	1	0.777778	0.857143	1	1	0.7
3	MS0	1	0.96875	1	0.806452	0.928571	0.833333	0.95122	0.892857	0.888889	0.966667	0.833333	0.866667	0.958333	0.913043	0.625	0.861111	0.9	1	1	0.4	0.882353	0	0.9	1	0.8	1	0.777778	0.625	0.875	0.833333	0.2	0.5	0.8	1	1	1	1	1	1	1	0.333333	1	0.928571	1	1	1	1	1
3	CK0	1	1	0.973684	1	1	1	0.97561	1	1	1	0.966667	0.933333	0.978723	1	1	0.972222	0.85	1	0.941176	1	1	1	0.95	1	1	1	0.888889	0.875	1	1	1	0.75	0.9	1	1	1	1	1	1	1	1	1	1	0.888889	1	1	1	1
3	PR0	1	0.9375	0.921053	0.967742	1	0.909091	0.902439	0.928571	1	0.965517	0.9	0.866667	1	0.826087	0.6875	0.944444	1	1	0.882353	0.9	1	1	0.85	1	1	1	0.888889	1	1	0.75	0.6	0.75	1	1	0.923077	1	1	1	0.933333	0.888889	1	1	0.928571	0.666667	1	1	0.857143	0.9
3	GZ0	1	1	0.921053	0.645161	1	0.916667	0.682927	0.857143	0.925926	0.966667	0.766667	0.766667	0.916667	0.956522	0.875	0.777778	0.7	1	1	0.3	1	0.666667	0.55	0.714286	0.8	1	0.444444	1	1	0.916667	0.6	0	0.5	1	0.846154	0.727273	1	0.947368	0.866667	0.888889	0.666667	0.941176	0.928571	0.555556	0.714286	1	1	0.7
3	MH0	1	0.84375	0.947368	0.741935	1	0.75	0.731707	0.75	0.846154	0.966667	0.633333	1	0.9375	0.826087	0.4375	0.888889	0.6	1	1	0.2	1	0	0.55	0.285714	0.4	1	0.222222	1	0.875	0.75	0	0	0.2	0.888889	0.846154	1	1	0.947368	0.866667	0.888889	1	0.941176	1	1	1	0.9	1	1
3	NS	1	0.96875	0.868421	0.935484	1	0.956522	0.853659	0.928571	0.962963	1	0.833333	0.966667	0.979167	0.952381	0.8125	0.916667	0.8	1	0.764706	0.8	1	0.666667	0.75	0.857143	0.8	1	0.555556	1	1	0.916667	0.6	0.5	0.7	1	1	1	1	1	1	1	1	1	1	1	1	1	1	1
3	GW	1	0.90625	0.710526	0.612903	0.964286	0.791667	0.731707	0.785714	0.961538	0.933333	0.566667	0.833333	0.916667	0.782609	0.5625	0.694444	0.75	1	0.882353	0.6	1	0	0.7	0.857143	1	1	0.444444	0.875	0.9375	0.666667	0.4	0	0.7	1	0.538462	0.454545	0	1	0.8	0.888889	0.666667	1	0.857143	0.555556	0.714286	1	1	0.7
3	DH	1	0.966667	0.921053	0.903226	1	0.916667	0.853659	0.892857	0.925926	0.966667	0.866667	0.833333	0.979167	0.913043	0.6875	0.833333	0.7	1	0.823529	0.7	1	0.666667	0.75	0.714286	0.6	1	0.777778	1	1	0.916667	0.4	0.25	0.4	1	1	1	1	1	0.933333	1	1	1	1	0.888889	0.857143	1	1	0.9
3	JS	1	0.9375	0.918919	0.903226	1	0.916667	1	1	0.962963	0.966667	0.866667	0.866667	0.9375	1	0.875	0.944444	0.9	1	1	1	1	1	1	1	0.8	1	0.666667	1	0.9375	1	0.6	1	0.9	1	0.846154	0.818182	1	1	1	1	1	1	1	0.555556	0.857143	1	1	0.8
3	KS	1	1	1	1	1	0.916667	0.926829	0.964286	0.962963	1	0.966667	0.866667	1	0.913043	0.875	1	1	1	1	1	1	0.333333	0.85	1	0.8	1	1	1	1	0.833333	0.8	1	1	1	1	1	1	1	1	0.888889	1	1	1	0.666667	1	1	1	1
3	RS	1	1	0.918919	0.83871	1	0.958333	0.878049	0.892857	1	0.966667	0.9	0.833333	0.895833	0.913043	1	0.916667	0.95	1	1	0.9	1	0.666667	0.9	1	1	1	1	1	0.8125	0.916667	1	0.75	1	1	0.769231	0.636364	1	1	0.8	0.666667	1	1	0.785714	0.777778	0.714286	1	1	0.8
3	NY	1	0.96875	0.973684	1	1	0.909091	1	0.964286	1	1	0.966667	0.966667	1	1	0.9375	0.972222	1	1	1	1	1	0.333333	1	1	1	1	1	1	1	1	1	1	1	1	1	1	1	1	1	1	1	1	1	0.888889	1	1	1	1
3	MV	1	0.96875	0.815789	0.774194	0.966667	0.875	0.756098	0.821429	0.851852	0.928571	0.733333	0.766667	0.851064	0.782609	0.5625	0.777778	0.8	1	0.705882	0.3	0.947368	0	0.6	0.714286	0.6	0.875	0.666667	0.75	0.666667	0.583333	0.2	0.25	0.6	1	0.923077	1	1	1	0.933333	0.666667	0.333333	1	0.714286	0.888889	0.714286	1	0.571429	0.5
3	SD	1	1	1	0.967742	1	1	0.97561	1	1	1	1	0.966667	1	0.956522	1	0.972222	1	1	1	1	1	1	0.95	1	1	1	1	1	1	0.916667	1	1	1	1	1	0.909091	1	1	1	1	1	1	1	0.888889	1	1	1	0.9
3	SW	1	0.96875	0.894737	0.967742	1	0.958333	0.878049	0.964286	1	1	1	0.966667	1	0.956522	1	0.916667	0.9	1	1	0.9	1	0.666667	0.95	1	1	1	1	1	1	0.916667	1	0.5	0.8	1	0.692308	1	1	1	0.733333	0.888889	1	1	1	0.888889	1	1	1	0.9
3	CR	1	0.96875	0.815789	0.774194	0.966667	0.958333	0.804878	0.785714	0.84	0.966667	0.966667	0.833333	0.851064	0.869565	0.8125	0.833333	0.8	1	0.941176	0.8	1	1	0.85	0.857143	0.8	0.9	0.888889	0.75	0.875	0.833333	0.6	0.5	0.6	1	0.769231	0.818182	0	1	0.8	0.444444	0	1	1	0.666667	0.285714	1	1	0.6
4	AV0	0	1	0.90625	0.962963	1	0.941176	0.9	0.925926	1	1	0.827586	0.857143	0.903226	0.75	0.733333	0.866667	0.642857		1	0.8	1	0.5	1	0.833333	1	1	0.444444		1	0.4	0.2	0	0.714286	1	0.692308	1	1	1	0.75	0.888889	1	1	1	0.777778	1	1	1	0.9
4	JD0	0	0.9375	0.757576	0.714286	0.923077	0.882353	0.580645	0.703704	0.8	0.956522	0.758621	0.666667	0.774194	0.538462	0.466667	0.7	0.5		0.666667	0.333333	1	0.5	0.25	0	0.8	1	0.555556		1	0.166667	0	0	0.571429	1	0.615385	0.636364	0	1	0.666667	0.777778	0	1	1	0.333333	0.571429	1	0.833333	0.4
4	AE0	0	0.875	0.939394	0.928571	1	0.823529	0.806452	0.666667	0.55	1	0.827586	0.47619	0.806452	0.846154	0.933333	0.833333	0.928571		1	1	1	0.5	0.666667	0.333333	0	1	0.555556		1	0.833333	1	1	0.857143	1	0.846154	0.909091	1	1	0.916667	0.888889	0.5	1	1	0.555556	0.571429	1	1	0.9
4	KC0	0	0.875	0.878788	0.821429	1	0.941176	0.83871	0.851852	0.85	0.913043	0.758621	0.714286	0.903226	0.846154	0.533333	0.8	0.785714		0.833333	0.333333	1	1	0.75	0.833333	0.8	1	0.444444		1	0.833333	0.6	1	0.571429	1	0.846154	0.909091	1	1	0.916667	1	0.5	1	0.916667	0.555556	0.714286	1	0.833333	0.6
4	RC0	0	0.9375	0.939394	0.857143	0.923077	0.941176	0.903226	0.925926	0.85	1	0.931034	0.809524	0.83871	1	0.8	0.833333	0.857143		1	1	1	1	1	1	1	1	0.888889		1	1	0.8	1	0.857143	1	0.769231	0.636364	0	1	0.833333	0.777778	0	1	1	0.666667	0.571429	1	1	0.6
4	CR0	0	0.75	0.575758	0.642857	0.846154	0.705882	0.483871	0.518519	0.8	0.869565	0.448276	0.571429	0.870968	0.692308	0.4	0.6	0.642857		0.5	0.5	1	0	0.333333	0	0.8	1	0.222222		1	0.5	0.2	0	0.571429	0.916667	0.538462	0.727273	0	1	0.75	0.666667	0.5	1	0.833333	0.777778	0.714286	1	0.833333	0.7
4	JY0	0	0.875	0.787879	0.678571	1	0.764706	0.709677	0.555556	0.7	0.826087	0.62069	0.619048	0.677419	0.846154	0.4	0.766667	0.571429		0.583333	0.5	1	0	0.5	0	0.2	0.857143	0.111111		0.333333	0.666667	0.2	0	0.142857	0.916667	0.769231	0.545455	1	0.916667	0.833333	0.444444	0.5	0.833333	0.916667	0.333333	0.285714	1	0.5	0.5
4	MT0	0	0.8125	0.625	0.678571	0.923077	0.823529	0.6	0.769231	0.7	0.952381	0.586207	0.619048	0.7	0.615385	0.466667	0.633333	0.357143		0.363636	0.333333	1	0.5	0.272727	0.8	0.4	1	0.111111		1	0.333333	0	0	0.285714	0.916667	0.538462	0.636364	0	1	0.666667	0.666667	0	0.916667	0.916667	0.222222	0.142857	1	1	0.6
4	CH	0	0.9375	0.969697	0.964286	1	1	0.935484	0.925926	1	0.956522	1	1	0.967742	1	0.933333	1	0.928571		1	1	1	1	0.916667	0.833333	1	1	1		1	1	0.8	1	0.857143	1	0.846154	0.909091	1	1	1	0.888889	1	1	1	1	0.857143	1	1	1
4	SS	0	0.75	0.878788	0.928571	0.923077	0.823529	0.83871	0.925926	0.85	0.826087	0.758621	0.52381	0.806452	0.769231	0.6	0.766667	0.642857		1	0.833333	1	0.5	1	0.833333	0.8	0.857143	0.333333		0.833333	0.666667	0.2	0	0.285714	0.916667	0.769231	0.909091	0	1	0.75	0.888889	0.5	0.916667	1	0.444444	0.285714	1	1	0.6
4	LC	0	1	0.787879	0.892857	0.923077	0.823529	0.806452	0.888889	0.7	0.956522	0.793103	0.809524	0.903226	0.769231	0.733333	0.8	0.857143		0.75	1	0.833333	0	0.916667	0.666667	0.4	1	0.444444		1	0.5	0.4	1	0.714286	1	0.692308	0.818182	1	0.916667	0.666667	1	0.5	0.916667	1	0.666667	0.714286	1	1	0.6
4	IB	0	0.8125	0.909091	0.928571	1	0.882353	0.83871	0.740741	0.7	0.869565	0.793103	0.809524	0.806452	0.923077	0.533333	0.9	0.714286		0.916667	1	1	0.5	0.666667	0.166667	0.2	0.857143	0.888889		0.833333	1	0.6	1	0.571429	0.833333	0.846154	0.909091	1	1	0.916667	1	0.5	0.833333	0.75	0.777778	0.571429	1	0.5	0.9
4	SS	0	0.6875	0.454545	0.142857	0.923077	0.647059	0.419355	0.333333	0.45	0.695652	0.37931	0.428571	0.548387	0.307692	0.133333	0.0666667	0.285714		0.75	0	1	0.5	0.5	0	0	1	0.333333		1	0.166667	0.2	0	0.285714	0.583333	0.230769	0.181818	0	0.833333	0.416667	0.333333	0	0.666667	0.416667	0.444444	0.285714	0.333333	0	0.1
4	BP	0	0.75	0.818182	0.642857	0.923077	0.764706	0.741935	0.444444	0.6	0.782609	0.586207	0.47619	0.645161	0.923077	0.133333	0.733333	0.428571		1	0.833333	1	0.5	0.833333	0	0.4	1	0.777778		1	1	0.2	1	0.571429	0.916667	0.461538	0.545455	0	1	0.666667	0.444444	0	0.75	0.666667	0.333333	0.571429	1	0.166667	0.4
4	RA	0	0.9375	0.757576	0.821429	1	0.764706	0.741935	0.703704	0.6	0.73913	0.482759	0.666667	0.677419	0.538462	0.4	0.7	0.571429		0.583333	0.666667	1	0	0.583333	0.166667	0.2	0.571429	0.111111		0.5	0.166667	0.2	0	0.428571	1	0.769231	0.818182	1	1	0.916667	0.777778	0.5	1	0.833333	0.444444	0.428571	1	0.666667	0.4
4	PJ0	0	1	0.939394	1	1	0.941176	0.83871	0.925926	0.85	0.956522	0.827586	0.809524	1	1	0.8	1	0.785714		0.916667	1	1	1	0.75	0.666667	0.4	1	0.555556		1	1	0.6	1	0.571429	1	0.846154	1	1	0.916667	0.916667	1	1	0.916667	0.916667	0.888889	1	1	1	1
4	MS0	1	0.875	0.818182	0.785714	1	1	0.83871	0.925926	0.85	1	0.827586	0.666667	0.870968	0.769231	0.933333	0.9	0.857143		0.833333	1	1	1	0.75	0.833333	1	1	0.555556		1	0.5	0.8	1	1	0.916667	0.769231	0.636364	1	1	0.833333	0.888889	0.5	1	1	0.555556	0.857143	1	1	0.9
4	ZC	1	0.9375	0.727273	0.714286	0.923077	0.941176	0.774194	0.777778	0.95	0.956522	0.793103	0.809524	0.870968	0.846154	0.666667	0.7	0.857143		0.833333	0.666667	1	1	0.916667	0.833333	1	1	0.777778		1	0.666667	0.4	0	0.857143	1	0.615385	0.727273	0	1	0.75	0.666667	0.5	0.916667	0.833333	0.555556	0.428571	1	0.666667	0.6
4	ET	1	1	0.90625	0.925926	1	0.882353	0.866667	0.888889	0.95	0.913043	0.827586	0.952381	0.967742	0.916667	0.933333	0.933333	0.857143		0.909091	0.8	1	0.5	0.909091	0.833333	1	1	0.777778		1	0.8	0.8	1	0.714286	1	0.769231	0.909091	1	0.916667	0.833333	0.777778	0.5	0.916667	0.916667	0.888889	0.857143	1	1	0.8
4	ZL	1	0.9375	0.969697	0.964286	1	0.823529	0.935484	0.851852	0.95	0.956522	0.965517	0.952381	0.967742	0.923077	0.933333	0.933333	1		1	1	1	0.5	0.916667	0.833333	1	1	1		1	1	1	1	1	0.916667	0.846154	0.909091	1	0.833333	0.916667	0.666667	1	0.916667	0.916667	0.888889	0.857143	0.833333	0.833333	0.8
4	MS	1	1	1	1	1	0.882353	1	1	1	0.956522	0.965517	1	0.967742	1	1	1	1		1	1	1	0.5	1	1	1	1	1		1	1	1	1	1	1	0.923077	1	1	1	1	1	1	1	1	1	0.857143	1	1	1
4	TR	1	1	0.939394	0.928571	1	1	0.903226	0.962963	1	1	0.896552	0.809524	0.967742	0.923077	0.8	0.9	0.785714		0.916667	0.833333	1	1	0.833333	1	1	1	0.666667		1	0.833333	0.4	0	0.571429	1	0.846154	1	1	1	0.916667	1	1	1	1	0.888889	0.857143	1	1	0.9
4	KQ	1	1	0.969697	1	1	1	0.935484	0.962963	0.95	0.956522	0.862069	0.904762	1	1	0.866667	0.966667	0.928571		0.916667	1	1	1	0.833333	0.833333	0.8	1	0.555556		1	1	0.6	1	0.857143	1	0.923077	1	1	1	1	1	1	1	1	0.888889	1	1	1	1
4	PG	1	1	0.96875	0.964286	1	0.882353	1	0.961538	1	1	0.793103	0.809524	0.966667	1	0.666667	0.866667	0.928571		1	1	1	0	1	1	1	1	0.444444		1	1	0	0	0.857143	1	0.846154	0.909091	1	1	1	0.888889	1	1	1	0.555556	0.857143	1	1	0.8
4	TD	1	0.9375	0.909091	0.892857	0.923077	0.941176	0.677419	0.851852	0.85	0.913043	0.586207	0.857143	0.83871	0.846154	0.333333	0.8	0.571429		0.833333	0.666667	0.833333	1	0.416667	0.5	0.4	0.857143	0		0.833333	0.833333	0	0	0.571429	1	0.923077	1	1	1	1	1	1	1	0.833333	1	1	1	0.666667	0.8
4	TN	1	0.9375	0.878788	0.928571	0.923077	0.941176	0.870968	0.888889	0.8	0.956522	0.793103	0.952381	0.935484	0.923077	0.733333	0.833333	0.857143		0.75	0.833333	1	1	0.75	0.5	0.6	1	0.777778		1	0.833333	0.4	0	0.714286	1	0.923077	1	1	1	1	1	0.5	1	1	1	0.857143	1	1	0.7
4	JB0	1	0.9375	0.939394	0.928571	1	0.882353	0.935484	0.851852	0.95	0.913043	0.965517	0.809524	0.967742	0.923077	0.8	0.9	0.928571		1	0.833333	1	0	1	0.833333	0.8	0.857143	1		0.833333	0.833333	0.6	1	0.857143	1	0.846154	1	1	1	0.916667	0.888889	1	1	1	0.888889	1	1	1	1
4	JL	1	1	0.969697	0.964286	1	0.941176	0.967742	1	1	0.956522	0.931034	0.904762	0.967742	1	0.866667	0.933333	1		1	1	1	0.5	1	1	1	1	1		1	1	1	1	1	1	0.923077	1	1	1	1	1	1	1	0.916667	1	1	1	0.666667	1
4	JK	1	1	0.818182	0.714286	0.923077	0.823529	0.774194	0.592593	0.65	0.913043	0.724138	0.666667	0.83871	0.846154	0.666667	0.666667	0.785714		0.833333	0.5	1	0	0.833333	0	0	1	0.111111		1	0.666667	0	0	0.714286	1	0.615385	0.545455	0	0.916667	0.583333	0.777778	0.5	0.833333	1	0.333333	0.428571	1	1	0.4
4	KB	1	0.9375	0.969697	0.892857	1	0.823529	0.870968	0.888889	1	1	0.896552	0.857143	1	0.692308	0.8	1	0.928571		0.916667	0.833333	1	0	0.666667	0.833333	1	1	0.777778		1	0.333333	0.6	1	0.857143	1	0.923077	0.909091	1	1	1	0.888889	1	1	1	1	1	1	1	1
4	DK	1	1	1	0.964286	1	0.941176	1	1	0.9	1	0.931034	1	0.967742	1	0.866667	1	0.928571		1	0.833333	1	0.5	1	1	0.6	1	0.777778		0.833333	1	0.6	1	0.857143	1	0.923077	1	1	1	1	1	1	1	1	1	1	1	1	1
4	JS	1	1	0.90625	1	0.916667	0.882353	0.9	0.888889	0.85	0.913043	0.793103	0.857143	0.903226	1	0.4	0.833333	0.714286		0.909091	1	1	0.5	0.909091	0.833333	1	0.857143	0.666667		0.833333	1	0	0	0.428571	1	0.769231	1	0	0.916667	0.833333	0.888889	0	0.916667	0.916667	0.666667	0.714286	1	0.666667	0.7
[truncated: 132 more columns]
